# Supplementary material
Source: Springer Nature journal article supplement (https://www.springermedizin.de/resource/supplementary/12871_2014_355_MOESM2_ESM.pdf/9429266)
Supplement: MOESM2 [file 9429266]

Assessed for eligibility (n=251)

- ◆ Not met inclusion criteria (n=181)
  - Aged < 20 y/o : 28
  - Difficult airway : 13
  - PatientD eclined: 10
  - ICU Case :25
  - Conscious unclear: 15
  - Loss explanationf or patient:90

Invited patient (n= 70 )

**TOC Group (n=35)**

- ◆ Received allocated to the tracheal lumen-covered

**TOE Group (n=35)**

- ◆ Received allocated to tracheal lumen-exposed

◆ Patient Withdrawn:(n=0)

◆ PatientW ithdrawn:(n=0)

**Clinical assessment**

**Demographic information**

- \*Age 、 Gender 、 BMI 、 ASA
- \*Upper Airway Characteristics

**Intubation condition**

- \*I ntubating time interval
- \*I ntubation attempts &B URP Maneuver
- \*D uration of tracheal operation time

**Post intubation**

- \*Side effects: (Hoarseness 、 Sore throat 、 Odynophagia)

**Anesthesia induction**

Fentanyl 2 $\mu$ g/kg + Thiamylal 5 mg/kg+ Cisatracurium0 .15m g/kg  
+p ropofol1 mg/kg

Discontinued intervention (n=2)

- ◆ Duration of surgery ime> 6 hrs (n=2)
- No patient loss follow-up except 2 duration of surgery time> 6 hrs

Discontinuedi ntervention (n=2)

- ◆ Duration of surgery time > 6 hrs (n=2)
- No patient loss follow-up except 2 duration of surgery time> 6 hrs

Complete data analysis(n=33)

Complete data analysis(n=33)
